# Supplementary material
Source: MDPI journal article supplement (https://www.mdpi.com/2071-1050/16/9/3780)
Supplement: s1 [file s1]

Results of a survey on the effect of CPC on each accident (Fisherman 1)

| No. | Condition                   | CPC                                 | Level                     | PII  | Collision while sailing | Getting caught in equipment | Slipping on the deck | Falling inside the boat | Getting caught in fishing nets |
|-----|-----------------------------|-------------------------------------|---------------------------|------|-------------------------|-----------------------------|----------------------|-------------------------|--------------------------------|
| 1   | Human reliability condition | Fatigue                             | Appropriate               | -1.1 |                         |                             |                      |                         |                                |
|     |                             |                                     | Acceptable                | 0    |                         | o                           |                      |                         |                                |
|     |                             |                                     | Inappropriate             | 1.9  | o                       |                             | o                    | o                       | o                              |
| 2   |                             | Adequacy of training and experience | Adequate, high experience | -1.4 | o                       | o                           |                      |                         | o                              |
|     |                             |                                     | Adequate, low experience  | 0    |                         |                             | o                    |                         |                                |
|     |                             |                                     | A little inadequate       | 1    |                         |                             |                      |                         |                                |
|     |                             |                                     | Inadequate                | 1.8  |                         |                             |                      | o                       |                                |
| 3   |                             | Crew collaboration quality          | Very efficient            | -1.4 |                         |                             |                      |                         |                                |
|     |                             |                                     | Efficient                 | 0    | o                       | o                           | o                    |                         | o                              |
|     |                             |                                     | Inefficient               | 0.4  |                         |                             |                      |                         |                                |
|     |                             |                                     | Deficient                 | 1.4  |                         |                             |                      | o                       |                                |
| 4   | Job condition               | Availability of procedures / plans  | Appropriate               | -1.2 |                         |                             |                      |                         |                                |
|     |                             |                                     | Acceptable                | 0    | o                       | o                           | o                    | o                       | o                              |
|     |                             |                                     | Inappropriate             | 1.4  |                         |                             |                      |                         |                                |
| 5   |                             | Number of simultaneous goals        | Fewer than capacity       | 0    |                         |                             |                      |                         |                                |
|     |                             |                                     | Matching current capacity | 0    |                         |                             |                      | o                       |                                |
|     |                             |                                     | More than capacity        | 1.2  | o                       | o                           | o                    |                         | o                              |
| 6   |                             | Available time                      | Adequate                  | -1.4 |                         |                             |                      |                         |                                |
|     |                             |                                     | Normal                    | 0    |                         |                             |                      |                         |                                |
|     |                             |                                     | Temporarily inadequate    | 1    |                         |                             |                      |                         |                                |
|     |                             |                                     | Continuously inadequate   | 2.4  | o                       | o                           | o                    | o                       | o                              |
| 7   | Dynamic condition           | Technical condition                 | Advantageous              | -0.8 |                         |                             |                      |                         |                                |
|     |                             |                                     | Compatible                | 0    |                         |                             |                      |                         |                                |
|     |                             |                                     | Incompatible              | 0.7  |                         |                             |                      |                         |                                |
| 8   |                             | Environmental condition             | Advantageous              | -1.1 |                         |                             |                      |                         |                                |
|     |                             |                                     | Compatible                | 0    |                         |                             |                      |                         |                                |
|     |                             |                                     | Incompatible              | 1.7  |                         |                             |                      |                         |                                |
| 9   |                             | Time of day (circadian rhythm)      | Very efficient            | 0    |                         |                             |                      |                         |                                |
|     |                             |                                     | Deficient                 | 0.6  |                         |                             |                      |                         |                                |

## Results of a survey on the effect of CPC on each accident (Fisherman 2)

| No. | Condition                   | CPC                                 | Level                     | PII  | Collision while sailing | Getting caught in equipment | Slipping on the deck | Falling inside the boat | Getting caught in fishing nets |
|-----|-----------------------------|-------------------------------------|---------------------------|------|-------------------------|-----------------------------|----------------------|-------------------------|--------------------------------|
| 1   | Human reliability condition | Fatigue                             | Appropriate               | -1.1 |                         |                             |                      |                         |                                |
|     |                             |                                     | Acceptable                | 0    | o                       |                             |                      |                         |                                |
|     |                             |                                     | Inappropriate             | 1.9  |                         | o                           | o                    | o                       | o                              |
| 2   |                             | Adequacy of training and experience | Adequate, high experience | -1.4 | o                       | o                           | o                    |                         |                                |
|     |                             |                                     | Adequate, low experience  | 0    |                         |                             |                      | o                       | o                              |
|     |                             |                                     | A little inadequate       | 1    |                         |                             |                      |                         |                                |
|     |                             |                                     | Inadequate                | 1.8  |                         |                             |                      |                         |                                |
| 3   |                             | Crew collaboration quality          | Very efficient            | -1.4 |                         |                             |                      |                         |                                |
|     |                             |                                     | Efficient                 | 0    | o                       | o                           | o                    | o                       | o                              |
|     |                             |                                     | Inefficient               | 0.4  |                         |                             |                      |                         |                                |
|     |                             |                                     | Deficient                 | 1.4  |                         |                             |                      |                         |                                |
| 4   | Job condition               | Availability of procedures / plans  | Appropriate               | -1.2 |                         |                             |                      |                         |                                |
|     |                             |                                     | Acceptable                | 0    | o                       | o                           | o                    | o                       | o                              |
|     |                             |                                     | Inappropriate             | 1.4  |                         |                             |                      |                         |                                |
| 5   |                             | Number of simultaneous goals        | Fewer than capacity       | 0    |                         |                             |                      |                         |                                |
|     |                             |                                     | Matching current capacity | 0    |                         |                             |                      |                         |                                |
|     |                             |                                     | More than capacity        | 1.2  | o                       | o                           | o                    | o                       | o                              |
| 6   |                             | Available time                      | Adequate                  | -1.4 |                         |                             |                      |                         |                                |
|     |                             |                                     | Normal                    | 0    |                         |                             |                      |                         |                                |
|     |                             |                                     | Temporarily inadequate    | 1    |                         |                             |                      |                         |                                |
|     |                             |                                     | Continuously inadequate   | 2.4  | o                       | o                           | o                    | o                       | o                              |
| 7   | Dynamic condition           | Technical condition                 | Advantageous              | -0.8 |                         |                             |                      |                         |                                |
|     |                             |                                     | Compatible                | 0    |                         |                             |                      |                         |                                |
|     |                             |                                     | Incompatible              | 0.7  |                         |                             |                      |                         |                                |
| 8   |                             | Environmental condition             | Advantageous              | -1.1 |                         |                             |                      |                         |                                |
|     |                             |                                     | Compatible                | 0    |                         |                             |                      |                         |                                |
|     |                             |                                     | Incompatible              | 1.7  |                         |                             |                      |                         |                                |
| 9   |                             | Time of day (circadian rhythm)      | Very efficient            | 0    |                         |                             |                      |                         |                                |
|     |                             |                                     | Deficient                 | 0.6  |                         |                             |                      |                         |                                |

Results of a survey on the effect of CPC on each accident (Fisherman 3)

| No. | Condition                   | CPC                                 | Level                     | PII  | Collision while sailing | Getting caught in equipment | Slipping on the deck | Falling inside the boat | Getting caught in fishing nets |
|-----|-----------------------------|-------------------------------------|---------------------------|------|-------------------------|-----------------------------|----------------------|-------------------------|--------------------------------|
| 1   | Human reliability condition | Fatigue                             | Appropriate               | -1.1 |                         |                             |                      |                         |                                |
|     |                             |                                     | Acceptable                | 0    | o                       | o                           | o                    | o                       |                                |
|     |                             |                                     | Inappropriate             | 1.9  |                         |                             |                      |                         | o                              |
| 2   |                             | Adequacy of training and experience | Adequate, high experience | -1.4 | o                       | o                           | o                    | o                       | o                              |
|     |                             |                                     | Adequate, low experience  | 0    |                         |                             |                      |                         |                                |
|     |                             |                                     | A little inadequate       | 1    |                         |                             |                      |                         |                                |
|     |                             |                                     | Inadequate                | 1.8  |                         |                             |                      |                         |                                |
| 3   |                             | Crew collaboration quality          | Very efficient            | -1.4 |                         |                             |                      |                         |                                |
|     |                             |                                     | Efficient                 | 0    | o                       | o                           | o                    | o                       | o                              |
|     |                             |                                     | Inefficient               | 0.4  |                         |                             |                      |                         |                                |
|     |                             |                                     | Deficient                 | 1.4  |                         |                             |                      |                         |                                |
| 4   | Job condition               | Availability of procedures / plans  | Appropriate               | -1.2 |                         |                             |                      |                         |                                |
|     |                             |                                     | Acceptable                | 0    | o                       | o                           | o                    | o                       | o                              |
|     |                             |                                     | Inappropriate             | 1.4  |                         |                             |                      |                         |                                |
| 5   |                             | Number of simultaneous goals        | Fewer than capacity       | 0    |                         |                             |                      |                         |                                |
|     |                             |                                     | Matching current capacity | 0    | o                       | o                           | o                    | o                       | o                              |
|     |                             |                                     | More than capacity        | 1.2  |                         |                             |                      |                         |                                |
| 6   |                             | Available time                      | Adequate                  | -1.4 |                         |                             |                      |                         |                                |
|     |                             |                                     | Normal                    | 0    |                         | o                           | o                    | o                       | o                              |
|     |                             |                                     | Temporarily inadequate    | 1    | o                       |                             |                      |                         |                                |
|     |                             |                                     | Continuously inadequate   | 2.4  |                         |                             |                      |                         |                                |
| 7   | Dynamic condition           | Technical condition                 | Advantageous              | -0.8 |                         |                             |                      |                         |                                |
|     |                             |                                     | Compatible                | 0    |                         |                             |                      |                         |                                |
|     |                             |                                     | Incompatible              | 0.7  |                         |                             |                      |                         |                                |
| 8   |                             | Environmental condition             | Advantageous              | -1.1 |                         |                             |                      |                         |                                |
|     |                             |                                     | Compatible                | 0    |                         |                             |                      |                         |                                |
|     |                             |                                     | Incompatible              | 1.7  |                         |                             |                      |                         |                                |
| 9   |                             | Time of day (circadian rhythm)      | Very efficient            | 0    |                         |                             |                      |                         |                                |
|     |                             |                                     | Deficient                 | 0.6  |                         |                             |                      |                         |                                |

## Results of a survey on the effect of CPC on each accident (Fisherman 4)

| No. | Condition                   | CPC                                 | Level                     | PII  | Collision while sailing | Getting caught in equipment | Slipping on the deck | Falling inside the boat | Getting caught in fishing nets |
|-----|-----------------------------|-------------------------------------|---------------------------|------|-------------------------|-----------------------------|----------------------|-------------------------|--------------------------------|
| 1   | Human reliability condition | Fatigue                             | Appropriate               | -1.1 |                         |                             |                      |                         |                                |
|     |                             |                                     | Acceptable                | 0    | o                       |                             |                      |                         |                                |
|     |                             |                                     | Inappropriate             | 1.9  |                         | o                           | o                    | o                       | o                              |
| 2   |                             | Adequacy of training and experience | Adequate, high experience | -1.4 | o                       | o                           |                      |                         |                                |
|     |                             |                                     | Adequate, low experience  | 0    |                         |                             |                      |                         |                                |
|     |                             |                                     | A little inadequate       | 1    |                         |                             | o                    | o                       |                                |
|     |                             |                                     | Inadequate                | 1.8  |                         |                             |                      |                         | o                              |
| 3   |                             | Crew collaboration quality          | Very efficient            | -1.4 | o                       |                             |                      |                         |                                |
|     |                             |                                     | Efficient                 | 0    |                         | o                           |                      |                         |                                |
|     |                             |                                     | Inefficient               | 0.4  |                         |                             | o                    |                         | o                              |
|     |                             |                                     | Deficient                 | 1.4  |                         |                             |                      | o                       |                                |
| 4   | Job condition               | Availability of procedures / plans  | Appropriate               | -1.2 |                         |                             |                      |                         |                                |
|     |                             |                                     | Acceptable                | 0    | o                       | o                           | o                    | o                       | o                              |
|     |                             |                                     | Inappropriate             | 1.4  |                         |                             |                      |                         |                                |
| 5   |                             | Number of simultaneous goals        | Fewer than capacity       | 0    |                         |                             |                      |                         |                                |
|     |                             |                                     | Matching current capacity | 0    | o                       |                             |                      |                         |                                |
|     |                             |                                     | More than capacity        | 1.2  |                         | o                           | o                    | o                       | o                              |
| 6   |                             | Available time                      | Adequate                  | -1.4 |                         |                             |                      |                         |                                |
|     |                             |                                     | Normal                    | 0    |                         |                             |                      |                         |                                |
|     |                             |                                     | Temporarily inadequate    | 1    | o                       | o                           | o                    |                         |                                |
|     |                             |                                     | Continuously inadequate   | 2.4  |                         |                             |                      | o                       | o                              |
| 7   | Dynamic condition           | Technical condition                 | Advantageous              | -0.8 |                         |                             |                      |                         |                                |
|     |                             |                                     | Compatible                | 0    |                         |                             |                      |                         |                                |
|     |                             |                                     | Incompatible              | 0.7  |                         |                             |                      |                         |                                |
| 8   |                             | Environmental condition             | Advantageous              | -1.1 |                         |                             |                      |                         |                                |
|     |                             |                                     | Compatible                | 0    |                         |                             |                      |                         |                                |
|     |                             |                                     | Incompatible              | 1.7  |                         |                             |                      |                         |                                |
| 9   |                             | Time of day (circadian rhythm)      | Very efficient            | 0    |                         |                             |                      |                         |                                |
|     |                             |                                     | Deficient                 | 0.6  |                         |                             |                      |                         |                                |

## Results of a survey on the effect of CPC on each accident (Fisherman 5)

| No. | Condition                   | CPC                                 | Level                     | PII  | Collision while sailing | Getting caught in equipment | Slipping on the deck | Falling inside the boat | Getting caught in fishing nets |
|-----|-----------------------------|-------------------------------------|---------------------------|------|-------------------------|-----------------------------|----------------------|-------------------------|--------------------------------|
| 1   | Human reliability condition | Fatigue                             | Appropriate               | -1.1 |                         |                             |                      |                         |                                |
|     |                             |                                     | Acceptable                | 0    |                         |                             |                      |                         |                                |
|     |                             |                                     | Inappropriate             | 1.9  | o                       | o                           | o                    | o                       | o                              |
| 2   |                             | Adequacy of training and experience | Adequate, high experience | -1.4 | o                       | o                           |                      |                         |                                |
|     |                             |                                     | Adequate, low experience  | 0    |                         |                             |                      |                         |                                |
|     |                             |                                     | A little inadequate       | 1    |                         |                             |                      |                         |                                |
|     |                             |                                     | Inadequate                | 1.8  |                         |                             | o                    | o                       | o                              |
| 3   |                             | Crew collaboration quality          | Very efficient            | -1.4 |                         |                             |                      |                         |                                |
|     |                             |                                     | Efficient                 | 0    |                         |                             |                      |                         |                                |
|     |                             |                                     | Inefficient               | 0.4  | o                       |                             |                      | o                       |                                |
|     |                             |                                     | Deficient                 | 1.4  |                         | o                           | o                    |                         | o                              |
| 4   | Job condition               | Availability of procedures / plans  | Appropriate               | -1.2 | o                       |                             |                      |                         |                                |
|     |                             |                                     | Acceptable                | 0    |                         | o                           | o                    |                         | o                              |
|     |                             |                                     | Inappropriate             | 1.4  |                         |                             |                      | o                       |                                |
| 5   |                             | Number of simultaneous goals        | Fewer than capacity       | 0    |                         |                             |                      | o                       |                                |
|     |                             |                                     | Matching current capacity | 0    | o                       |                             |                      |                         |                                |
|     |                             |                                     | More than capacity        | 1.2  |                         | o                           | o                    |                         | o                              |
| 6   |                             | Available time                      | Adequate                  | -1.4 |                         |                             |                      |                         |                                |
|     |                             |                                     | Normal                    | 0    |                         |                             |                      |                         |                                |
|     |                             |                                     | Temporarily inadequate    | 1    |                         |                             |                      |                         |                                |
|     |                             |                                     | Continuously inadequate   | 2.4  | o                       | o                           | o                    | o                       | o                              |
| 7   | Dynamic condition           | Technical condition                 | Advantageous              | -0.8 |                         |                             |                      |                         |                                |
|     |                             |                                     | Compatible                | 0    |                         |                             |                      |                         |                                |
|     |                             |                                     | Incompatible              | 0.7  |                         |                             |                      |                         |                                |
| 8   |                             | Environmental condition             | Advantageous              | -1.1 |                         |                             |                      |                         |                                |
|     |                             |                                     | Compatible                | 0    |                         |                             |                      |                         |                                |
|     |                             |                                     | Incompatible              | 1.7  |                         |                             |                      |                         |                                |
| 9   |                             | Time of day (circadian rhythm)      | Very efficient            | 0    |                         |                             |                      |                         |                                |
|     |                             |                                     | Deficient                 | 0.6  |                         |                             |                      |                         |                                |

## Results of a survey on the effect of CPC on each accident (Fisherman 6)

| No. | Condition                   | CPC                                 | Level                     | PII  | Collision while sailing | Getting caught in equipment | Slipping on the deck | Falling inside the boat | Getting caught in fishing nets |
|-----|-----------------------------|-------------------------------------|---------------------------|------|-------------------------|-----------------------------|----------------------|-------------------------|--------------------------------|
| 1   | Human reliability condition | Fatigue                             | Appropriate               | -1.1 |                         |                             |                      |                         |                                |
|     |                             |                                     | Acceptable                | 0    |                         |                             |                      |                         |                                |
|     |                             |                                     | Inappropriate             | 1.9  | o                       | o                           | o                    | o                       | o                              |
| 2   |                             | Adequacy of training and experience | Adequate, high experience | -1.4 | o                       | o                           | o                    | o                       | o                              |
|     |                             |                                     | Adequate, low experience  | 0    |                         |                             |                      |                         |                                |
|     |                             |                                     | A little inadequate       | 1    |                         |                             |                      |                         |                                |
|     |                             |                                     | Inadequate                | 1.8  |                         |                             |                      |                         |                                |
| 3   |                             | Crew collaboration quality          | Very efficient            | -1.4 |                         |                             |                      |                         |                                |
|     |                             |                                     | Efficient                 | 0    |                         |                             |                      |                         |                                |
|     |                             |                                     | Inefficient               | 0.4  |                         |                             |                      |                         |                                |
|     |                             |                                     | Deficient                 | 1.4  | o                       | o                           | o                    | o                       | o                              |
| 4   | Job condition               | Availability of procedures / plans  | Appropriate               | -1.2 |                         |                             |                      |                         |                                |
|     |                             |                                     | Acceptable                | 0    | o                       | o                           | o                    | o                       | o                              |
|     |                             |                                     | Inappropriate             | 1.4  |                         |                             |                      |                         |                                |
| 5   |                             | Number of simultaneous goals        | Fewer than capacity       | 0    |                         |                             |                      |                         |                                |
|     |                             |                                     | Matching current capacity | 0    |                         |                             |                      |                         |                                |
|     |                             |                                     | More than capacity        | 1.2  | o                       | o                           | o                    | o                       | o                              |
| 6   |                             | Available time                      | Adequate                  | -1.4 |                         |                             |                      |                         |                                |
|     |                             |                                     | Normal                    | 0    |                         |                             |                      |                         |                                |
|     |                             |                                     | Temporarily inadequate    | 1    |                         |                             |                      |                         |                                |
|     |                             |                                     | Continuously inadequate   | 2.4  | o                       | o                           | o                    | o                       | o                              |
| 7   | Dynamic condition           | Technical condition                 | Advantageous              | -0.8 |                         |                             |                      |                         |                                |
|     |                             |                                     | Compatible                | 0    |                         |                             |                      |                         |                                |
|     |                             |                                     | Incompatible              | 0.7  |                         |                             |                      |                         |                                |
| 8   |                             | Environmental condition             | Advantageous              | -1.1 |                         |                             |                      |                         |                                |
|     |                             |                                     | Compatible                | 0    |                         |                             |                      |                         |                                |
|     |                             |                                     | Incompatible              | 1.7  |                         |                             |                      |                         |                                |
| 9   |                             | Time of day (circadian rhythm)      | Very efficient            | 0    |                         |                             |                      |                         |                                |
|     |                             |                                     | Deficient                 | 0.6  |                         |                             |                      |                         |                                |

## Results of a survey on the effect of CPC on each accident (Fisherman 7)

| No. | Condition                   | CPC                                 | Level                     | PII  | Collision while sailing | Getting caught in equipment | Slipping on the deck | Falling inside the boat | Getting caught in fishing nets |
|-----|-----------------------------|-------------------------------------|---------------------------|------|-------------------------|-----------------------------|----------------------|-------------------------|--------------------------------|
| 1   | Human reliability condition | Fatigue                             | Appropriate               | -1.1 |                         |                             |                      |                         |                                |
|     |                             |                                     | Acceptable                | 0    | o                       |                             |                      |                         |                                |
|     |                             |                                     | Inappropriate             | 1.9  |                         | o                           | o                    | o                       | o                              |
| 2   |                             | Adequacy of training and experience | Adequate, high experience | -1.4 |                         |                             |                      |                         |                                |
|     |                             |                                     | Adequate, low experience  | 0    |                         | o                           | o                    |                         |                                |
|     |                             |                                     | A little inadequate       | 1    |                         |                             |                      | o                       | o                              |
|     |                             |                                     | Inadequate                | 1.8  | o                       |                             |                      |                         |                                |
| 3   |                             | Crew collaboration quality          | Very efficient            | -1.4 |                         |                             |                      |                         |                                |
|     |                             |                                     | Efficient                 | 0    | o                       | o                           |                      |                         |                                |
|     |                             |                                     | Inefficient               | 0.4  |                         |                             | o                    | o                       | o                              |
|     |                             |                                     | Deficient                 | 1.4  |                         |                             |                      |                         |                                |
| 4   | Job condition               | Availability of procedures / plans  | Appropriate               | -1.2 |                         |                             |                      |                         |                                |
|     |                             |                                     | Acceptable                | 0    | o                       |                             | o                    |                         |                                |
|     |                             |                                     | Inappropriate             | 1.4  |                         | o                           |                      | o                       | o                              |
| 5   |                             | Number of simultaneous goals        | Fewer than capacity       | 0    |                         |                             |                      |                         |                                |
|     |                             |                                     | Matching current capacity | 0    |                         |                             |                      | o                       | o                              |
|     |                             |                                     | More than capacity        | 1.2  | o                       | o                           | o                    |                         |                                |
| 6   |                             | Available time                      | Adequate                  | -1.4 |                         |                             |                      |                         |                                |
|     |                             |                                     | Normal                    | 0    |                         |                             |                      |                         |                                |
|     |                             |                                     | Temporarily inadequate    | 1    | o                       |                             |                      |                         | o                              |
|     |                             |                                     | Continuously inadequate   | 2.4  |                         | o                           | o                    | o                       |                                |
| 7   | Dynamic condition           | Technical condition                 | Advantageous              | -0.8 |                         |                             |                      |                         |                                |
|     |                             |                                     | Compatible                | 0    |                         |                             |                      |                         |                                |
|     |                             |                                     | Incompatible              | 0.7  |                         |                             |                      |                         |                                |
| 8   |                             | Environmental condition             | Advantageous              | -1.1 |                         |                             |                      |                         |                                |
|     |                             |                                     | Compatible                | 0    |                         |                             |                      |                         |                                |
|     |                             |                                     | Incompatible              | 1.7  |                         |                             |                      |                         |                                |
| 9   |                             | Time of day (circadian rhythm)      | Very efficient            | 0    |                         |                             |                      |                         |                                |
|     |                             |                                     | Deficient                 | 0.6  |                         |                             |                      |                         |                                |

# Effect of CPC on shipboard operations based on the fisherman's career

(The higher the score, the more negative it is.)

|     | Career                              | 30          | 20          | 30          | 40          | 52          | 50          | 41          |
|-----|-------------------------------------|-------------|-------------|-------------|-------------|-------------|-------------|-------------|
| No. | CPCs                                | Fisherman 1 | Fisherman 2 | Fisherman 3 | Fisherman 4 | Fisherman 5 | Fisherman 6 | Fisherman 7 |
| 1   | Fatigue                             | 20          | 100         | 20          | 80          | 100         | 100         | 100         |
| 2   | Adequacy of training and experience | 80          | 10          | 50          | 100         | 10          | 100         | 50          |
| 3   | Crew collaboration quality          | 90          | 100         | 80          | 50          | 80          | 10          | 80          |
| 4   | Availability of procedures / plans  | 30          | 50          | 20          | 50          | 80          | 50          | 50          |
| 5   | Number of simultaneous goals        | 70          | 50          | 20          | 40          | 100         | 50          | 50          |
| 6   | Available time                      | 60          | 70          | 20          | 40          | 100         | 50          | 90          |
| 7   | Technical condition                 | 10          | 20          | 20          | 90          | 10          | 10          | 80          |
| 8   | Environmental condition             | 100         | 40          | 80          | 40          | 100         | 10          | 100         |
| 9   | Time of day (circadian rhythm)      | 50          | 50          | 50          | 30          | 70          | 50          | 80          |
